# Supplementary material for: Abundance of Entomopathogenic Fungi in Leaf Litter and Soil Layers in Forested Habitats in Poland
Source: MDPI journal article supplement (doi:10.3390/insects12020134), 2021-02-05
Supplement: s1 [file s1]

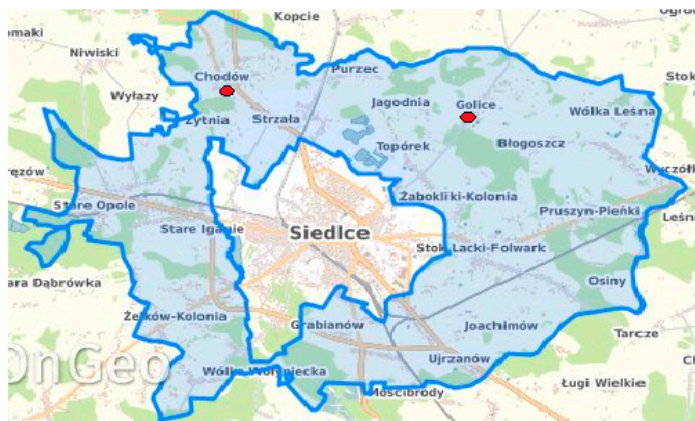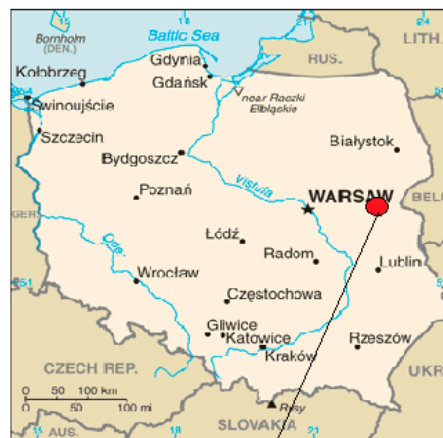

Siedlce, Masovian Voivodeship,  
District Siedlce  
◦ - place of sampling

Figure S1. Location of Sampling for testing.

Table S1. Average values of temperature and precipitation in 2015–2017 (Siedlce district).

| Month              | Years             |                |                   |                |                   |                |
|--------------------|-------------------|----------------|-------------------|----------------|-------------------|----------------|
|                    | 2015              |                | 2016              |                | 2017              |                |
|                    | Temperature<br>°C | Rainfall<br>mm | Temperature<br>°C | Rainfall<br>mm | Temperature<br>°C | Rainfall<br>mm |
| January            | 0.6               | 44.0           | -4.5              | 10.9           | -6.6              | 0.4            |
| February           | 0.7               | 1.40           | 2.5               | 29.0           | -1.3              | 15.9           |
| March              | 4.6               | 12.0           | 3.5               | 33.5           | 5.5               | 25.1           |
| April              | 8.6               | 35.2           | 9.1               | 28.7           | 6.9               | 59.6           |
| May                | 13.6              | 38.6           | 15.1              | 54.8           | 13.9              | 49.5           |
| June               | 17.7              | 19.2           | 18.4              | 36.9           | 17.8              | 57.9           |
| July               | 20.1              | 49.0           | 19.1              | 35.2           | 16.9              | 23.6           |
| August             | 22.1              | 7.5            | 18.0              | 31.7           | 18.4              | 54.7           |
| September          | 15.0              | 23.4           | 14.9              | 13.6           | 13.9              | 80.1           |
| October            | 7.0               | 22.8           | 7.0               | 69.8           | 9.0               | 53.0           |
| November           | 4.7               | 18.7           | 2.4               | 19.5           | 4.1               | 21.3           |
| December           | 3.6               | 8.2            | 0                 | 11.3           | 2.7               | 15.9           |
| The average annual | 9.9               | 23.0           | 8.8               | 31.2           | 8.4               | 38.0           |

Data from the Zawady weather station.

**Table S2.** The pH value and the content of organic matter in the forest litter and soil samples (average value from the 0-20 cm layer) of the studied forest types.

| Forest Type       | Depth<br>cm   | Locality |      |        |      |
|-------------------|---------------|----------|------|--------|------|
|                   |               | Golice   |      | Chodów |      |
|                   |               | pH KCl   | OS % | pH KCl | OS % |
| Coniferous forest | forest litter | 4.51     | 78.3 | 4.01   | 90.5 |
|                   | 0-20          | 3.97     | 1.57 | 4.33   | 1.11 |
| Deciduous forest  | forest litter | 5.19     | 67.8 | 4.99   | 58.0 |
|                   | 0-20          | 4.34     | 3.20 | 4.42   | 1.68 |
| Mixed forest      | forest litter | 4.76     | 81.9 | 4.77   | 91.9 |
|                   | 0-20          | 4.15     | 2.42 | 4.27   | 3.39 |

OS - organic substance.
